# Supplementary material for: HER2 Status in High-Risk Endometrial Cancers (PORTEC-3): Relationship with Histotype, Molecular Classification, and Clinical Outcomes
Source: MDPI journal article supplement (doi:10.3390/cancers13010044), 2020-12-25
Supplement: s1 [file s1]

# Supplementary Materials: HER2 Status in High-Risk Endometrial Cancers (PORTEC-3): Relationship with Histotype, Molecular Classification, and Clinical Outcomes

Lisa Vermij, Nanda Horeweg, Alicia Leon-Castillo, Tessa A. Rutten, Linda R. Mileschkin, Helen J. Mackay, Alexandra Leary, Melanie E. Powell, Naveena Singh, Emma J. Crosbie, Vincent T.H.B.M. Smit, Carien L. Creutzberg and Tjalling Bosse

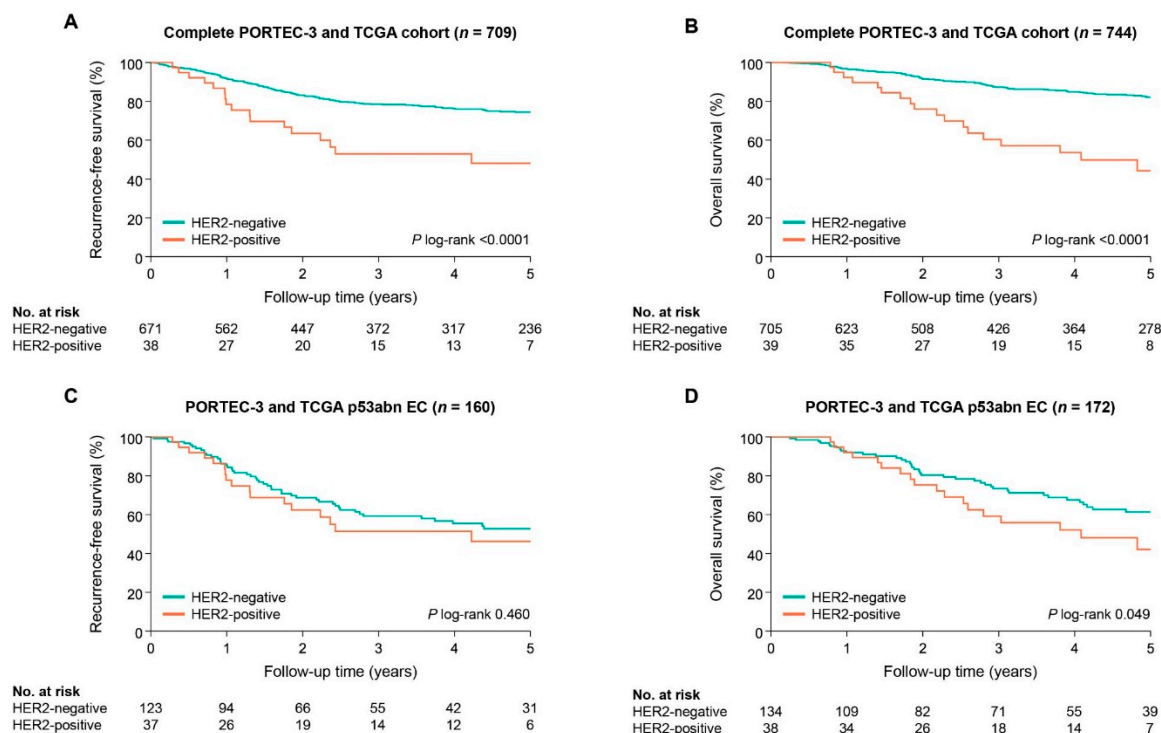

**Figure S1.** Kaplan–Meier survival curves for (A) recurrence-free survival (RFS) and (B) overall survival (OS) in patients with HER2-positive and HER2-negative endometrial cancer (EC) from the combined PORTEC-3 and TCGA UCEC cohorts; (C) RFS and (D) OS for patients with HER2-positive and HER2-negative p53-abnormal EC.

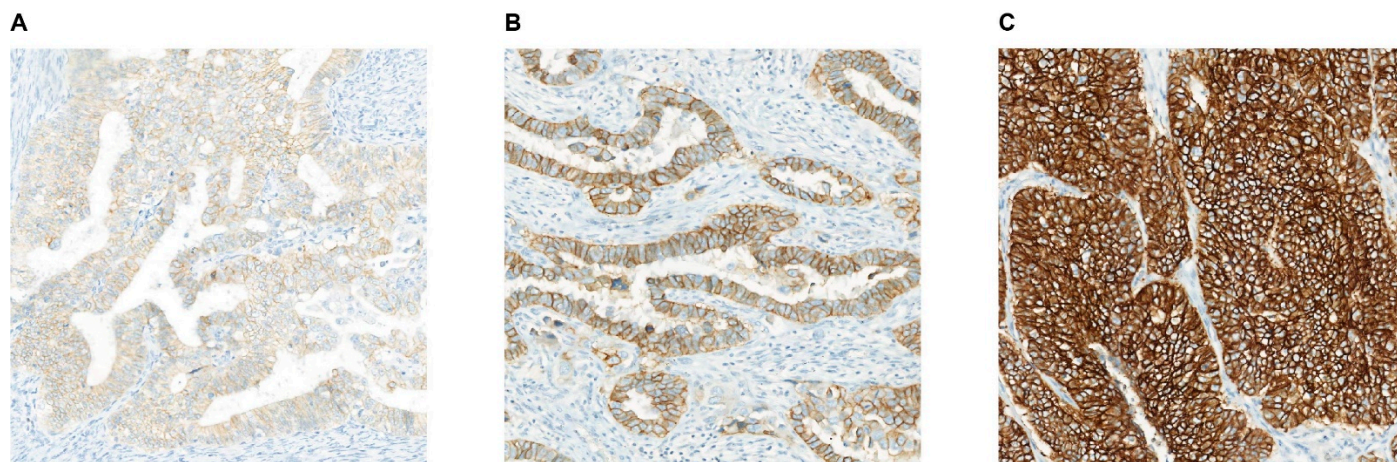

**Figure S2.** Representative examples of faint, moderate and strong membranous HER2 immunoreactivity in endometrial cancer. Representative examples of HER2 immunohistochemistry with (A) faint membranous immunoreactivity, (B) moderate membranous immunoreactivity, and (C) strong membranous immunoreactivity.

**Table S1.** Multivariable analysis of HER2 status and clinicopathological features in the combined PORTEC-3 and TCGA Uterine Corpus Endometrial Carcinoma cohort.

|                          | Total <i>n</i> | Recurrence-Free Survival<br>164 Events |             |                 | Total <i>n</i> | Overall Survival<br>121 Events |             |                 |
|--------------------------|----------------|----------------------------------------|-------------|-----------------|----------------|--------------------------------|-------------|-----------------|
|                          |                | HR                                     | 95% CI      | <i>p</i> -value |                | HR                             | 95% CI      | <i>p</i> -value |
| Age                      | 684            | 1.009                                  | 0.990–1.028 | 0.38            | 717            | 1.033                          | 1.009–1.058 | 0.006           |
| HER2 status              |                |                                        |             |                 |                |                                |             |                 |
| Negative                 | 647            | 1                                      |             |                 | 679            | 1                              |             |                 |
| Positive                 | 37             | 1.180                                  | 0.670–2.077 | 0.57            | 38             | 1.389                          | 0.784–2.460 | 0.26            |
| Molecular subgroups      |                |                                        |             |                 |                |                                |             |                 |
| MMRd                     | 224            | 1                                      |             |                 | 237            | 1                              |             |                 |
| p53abn                   | 152            | 2.291                                  | 1.447–3.628 | <0.0001         | 163            | 2.045                          | 1.230–3.398 | 0.006           |
| POLEmut                  | 78             | 0.055                                  | 0.008–0.398 | 0.004           | 80             | 0.239                          | 0.073–0.786 | 0.018           |
| NSMP                     | 230            | 0.943                                  | 0.620–1.435 | 0.79            | 237            | 0.685                          | 0.391–1.197 | 0.18            |
| Histology and grade      |                |                                        |             |                 |                |                                |             |                 |
| Endometrioid, low grade  | 318            | 1                                      |             |                 | 327            | 1                              |             |                 |
| Endometrioid, high grade | 188            | 1.156                                  | 0.745–1.794 | 0.52            | 203            | 1.821                          | 1.068–3.104 | 0.028           |
| Non-endometrioid         | 178            | 0.869                                  | 0.531–1.423 | 0.58            | 187            | 1.325                          | 0.736–2.386 | 0.35            |

|         |     |       |             |         |  |     |       |             |         |
|---------|-----|-------|-------------|---------|--|-----|-------|-------------|---------|
| Stage   |     |       |             |         |  |     |       |             |         |
| I–II    | 442 | 1     |             |         |  | 458 | 1     |             |         |
| III–IV  | 242 | 2.146 | 1.552–2.968 | <0.0001 |  | 259 | 2.200 | 1.512–3.202 | <0.0001 |
| LVSI    |     |       |             |         |  |     |       |             |         |
| Absent  | 326 | 1     |             |         |  | 340 | 1     |             |         |
| Present | 358 | 1.270 | 0.903–1.787 | 0.17    |  | 377 | 1.544 | 1.019–2.341 | 0.040   |

Abbreviations: HR, hazard ratio; POLEmut, POLE (ultra-)mutated; MMRd, mismatch repair deficient; NSMP, No Specific Molecular Profile; p53abn, p53 abnormal; LVSI, lymphovascular space invasion.

**Table S2.** Comparison of HER2 status assessed by immunohistochemistry, scored by adjusted ASCO/CAP 2007 breast cancer guideline for HER2 testing, and dual in situ hybridization.

| Adjusted ASCO/CAP 2007 BC Guideline* | HER2 DISH            |                  |               |                     | Total<br>(n) |
|--------------------------------------|----------------------|------------------|---------------|---------------------|--------------|
|                                      | Not Amplified<br>(n) | Amplified<br>(n) | Failed<br>(n) | Not Analysed<br>(n) |              |
| IHC 0                                | 10                   | 0                | 0             | 253                 | 263          |
| IHC 1+                               | 17                   | 2                | 2             | 34                  | 55           |
| IHC 2+                               | 44                   | 6                | 1             | 1                   | 52           |
| IHC 3+                               | 6                    | 16               | 0             | 0                   | 22           |
| Failed                               | 13                   | 0                | 0             | 0                   | 13           |
| Total                                | 90                   | 24               | 3             | 288                 | 405          |

Abbreviations: BC, breast cancer; DISH, dual in situ hybridisation.

\*Adjusted ASCO/CAP 2007 breast cancer scoring criteria.

| Original Scoring Criteria |                      | Adjusted Scoring Criteria |
|---------------------------|----------------------|---------------------------|
| IHC 0                     | No staining observed | No staining observed      |

|           |                                                                                                                                                                                     |                                                                                                                                                                                     |
|-----------|-------------------------------------------------------------------------------------------------------------------------------------------------------------------------------------|-------------------------------------------------------------------------------------------------------------------------------------------------------------------------------------|
| IHC<br>1+ | Weak, incomplete membrane staining in any proportion or weak, complete membrane staining in <10% of cells                                                                           | Weak, incomplete membrane staining in any proportion or weak, complete membrane staining in <10% of tumour cells or moderate (in)complete membrane staining in <10% of tumour cells |
| IHC<br>2+ | Complete membrane staining that is nonuniform or weak but with obvious circumferential distribution in >10% of cells, or intense complete membrane staining in ≤30% of tumour cells | Weak, complete or moderate, (in)complete membrane staining in >10% of tumour cells or intense, (in)complete membrane staining in ≤30% of tumour cells                               |
| IHC<br>3+ | Uniform intense membrane staining in >30% of tumour cells                                                                                                                           | Intense, (in)complete membrane staining in >30% of tumour cells                                                                                                                     |
